# Supplementary material for: Switched Fluorogenic CRISPR-tDeg System for RNA Imaging in Living Cells
Source: Research Square preprint supplement (doi:10.21203/rs.3.rs-6073102/v1), 2025-03-26
Supplement: Supplementary file 1 [file b63ec70fe05a628f820bad01.pdf]

# **Switched Fluorogenic CRISPR-tDeg System for RNA Imaging in Living Cells**

Huimin Zhong<sup>1,2</sup>, Jiayan Zhou<sup>1,2</sup>, Fujun Qin<sup>2</sup>, Xian-En Zhang<sup>3,4,\*</sup>, Minghai Chen<sup>2,\*</sup>

<sup>1</sup> College of Life Science and Technology, Huazhong University of Science and Technology, Wuhan 430074, China

<sup>2</sup> State Key Laboratory of Quantitative Synthetic Biology, Shenzhen Institute of Synthetic Biology, Shenzhen Institutes of Advanced Technology, Chinese Academy of Sciences, Shenzhen 518055, China

<sup>3</sup> Faculty of Synthetic Biology, Shenzhen University of Advanced Technology, Shenzhen 518107, China

<sup>4</sup> National Laboratory of Biomacromolecules, Key Laboratory of Biomacromolecules (CAS), Institute of Biophysics, Chinese Academy of Sciences, Beijing 100101, China

\*Corresponding author: Minghai Chen, Email: mh.chen1@siat.ac.cn or Xian-En Zhang, Email: zhangxe@ibp.ac.cn

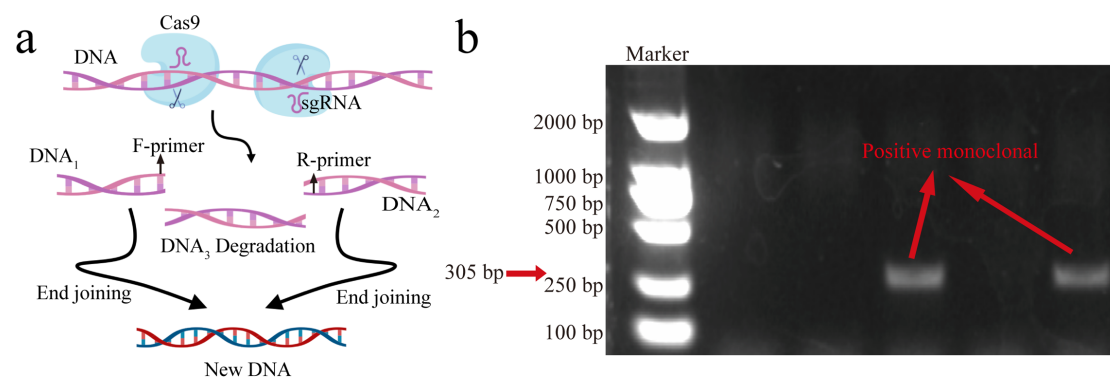

**Fig. S1. The construction of the gene knockout (KO) cell lines.** (a) Schematic diagram of nonhomologous end joining (NHEJ). (b) PCR gel plot showing positive KO monoclonal in (a).

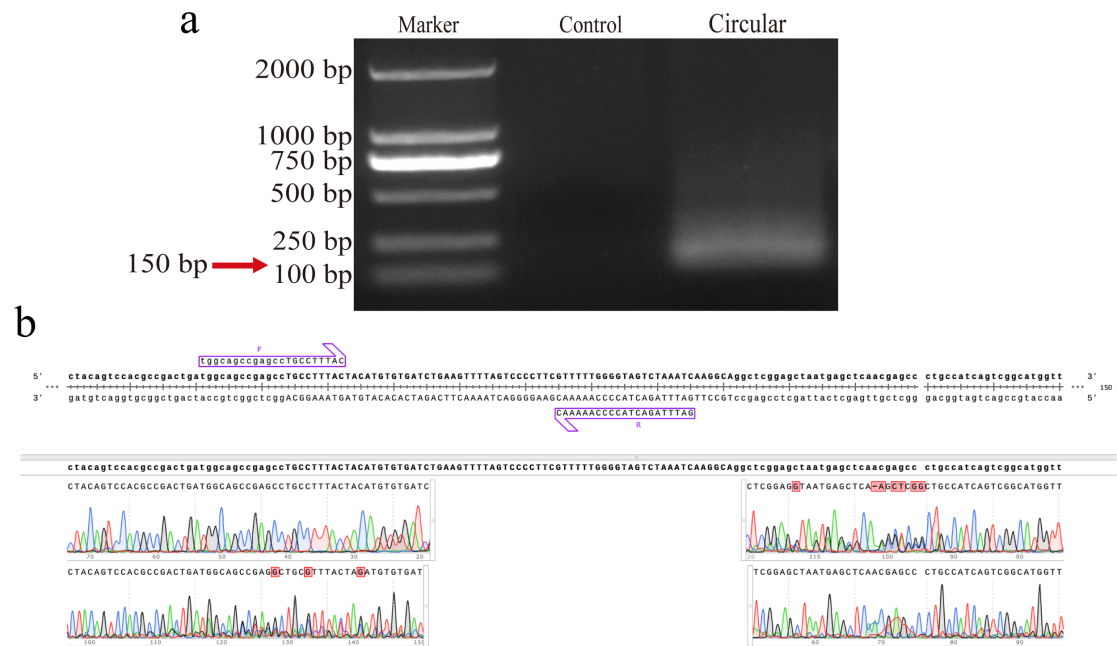

**Fig. S2. The development of the circular switched sgRNA.** (a) Gel electrophoresis to demonstrate the engineered sgRNA circular structure. (b) Sequencing results confirming engineered sgRNA circular structure.

| Original tDeg | S | G | P | R | P | R | G | T | R | G | K | G | R | R | I | R | R | R | G |   |   |   |   |   |   |   |   |   |   |
|---------------|---|---|---|---|---|---|---|---|---|---|---|---|---|---|---|---|---|---|---|---|---|---|---|---|---|---|---|---|---|
| Y1            | * | * | * | * | * | * | * | * | * | * | * | * | * | * | K | * | H | Y | C | F | G |   |   |   |   |   |   |   |   |
| Y2            | * | * | * | * | * | * | * | * | * | * | * | * | * | * | K | * | H | Y | K | K | V | G | T | M | A | A | G |   |   |
| Y3            | * | * | * | * | * | * | * | * | * | * | * | * | * | * | K | * | H | Y | K | K | V | G | T | M | R | G | R | G | L |
| Y4            | * | * | * | * | * | * | * | * | * | * | * | * | * | * | K | * | N | Y | K | S | G |   |   |   |   |   |   |   |   |
| Y5            | * | * | * | * | * | * | * | * | * | * | * | * | * | * | K | * | * | Y | * | * | N |   |   |   |   |   |   |   |   |
| Y6            | * | * | * | * | * | * | * | * | * | * | * | * | * | * | K | * | * | Y | * | R | G |   |   |   |   |   |   |   |   |
| Y7            | * | * | * | * | * | * | * | * | * | * | * | * | * | * | K | * | * | Y | * | R | G | N |   |   |   |   |   |   |   |
| Y8            | * | * | * | * | * | * | * | * | * | * | * | * | * | * | K | * | H | Y | K | K | V | G | M | G | R | K |   |   |   |
| I1            | * | * | * | * | * | * | * | * | * | * | * | * | * | * | L | * | * | Y | T | Y | C | G | L |   |   |   |   |   |   |
| I2            | * | * | * | * | * | * | * | * | * | * | * | * | * | * | L | * | * | V | T | Y | C | G | L |   |   |   |   |   |   |
| I3            | * | * | * | * | * | * | * | * | * | * | * | * | * | * | K | * | L | L | G | * |   |   |   |   |   |   |   |   |   |
| I4            | * | * | * | * | * | * | * | * | * | * | * | * | * | * | K | * | A | A | E | * |   |   |   |   |   |   |   |   |   |
| g1            | * | * | * | * | * | * | * | * | * | * | * | * | * | * | * | * | * | * | G | M | G | G |   |   |   |   |   |   |   |
| g2            | * | * | * | * | * | * | * | * | * | * | * | * | * | * | * | * | * | * | V | Q | W | G |   |   |   |   |   |   |   |
| g3            | * | * | * | * | * | * | * | * | * | * | * | * | * | * | * | * | * | * | W | * | R | R | G |   |   |   |   |   |   |
| g4            | * | * | * | * | * | * | * | * | * | * | * | * | * | * | * | * | * | * | P | C | Q | R | G |   |   |   |   |   |   |
| g5            | * | * | * | * | * | * | * | * | * | * | * | * | * | * | * | * | * | * | A | P | R | Q | P | S | R | D | G |   |   |
| g6            | * | * | * | * | * | * | * | * | * | * | * | * | * | * | * | * | * | * | G | P | S | S | G | G |   |   |   |   |   |
| g7            | * | * | * | * | * | * | * | * | * | * | * | * | * | * | * | * | * | * | S | * | L | R | R | R | R | H | R | G | E |
| g8            | * | * | * | * | * | * | * | * | * | * | * | * | * | * | * | * | * | * | L | T | G | F | S | G | M | K | G |   |   |
| g9            | * | * | * | * | * | * | * | * | * | * | * | * | * | * | * | * | * | * | Q | R | S | R | D | G |   |   |   |   |   |
| g10           | * | * | * | * | * | * | * | * | * | * | * | * | * | * | * | * | * | * | H | W | R | G | Q | E | G |   |   |   |   |
| G1            | * | * | * | * | * | * | * | * | * | * | * | * | * | * | * | * | * | * | * | * | * | * | * | * | * | * | * | L |   |
| G2            | * | * | * | * | * | * | * | * | * | * | * | * | * | * | * | * | G | L | L | * | G |   |   |   |   |   |   |   |   |
| G3            | * | * | * | * | * | * | * | * | * | * | * | * | * | * | A | * | H | G | G |   |   |   |   |   |   |   |   |   |   |
| G4            | * | * | * | * | * | * | * | * | * | * | * | * | * | * | * | * | * | G | M | * | G |   |   |   |   |   |   |   |   |
| G5            | * | * | * | * | * | * | * | * | * | * | * | * | * | * | * | * | P | * | K | Q | G |   |   |   |   |   |   |   |   |
| G6            | * | * | * | * | * | * | * | * | * | * | * | * | * | * | * | * | * | V | Q | W | G |   |   |   |   |   |   |   |   |
| G7            | * | * | * | * | * | * | * | * | * | * | * | * | * | * | * | * | * | W | G | R | R | G |   |   |   |   |   |   |   |
| G8            | * | * | * | * | * | * | * | * | * | * | * | * | * | * | * | * | * | P | C | Q | R | G |   |   |   |   |   |   |   |
| G9            | * | * | * | * | * | * | * | * | * | * | * | * | * | * | * | * | * | A | P | R | Q | P | S | R | D | G |   |   |   |
| G10           | * | * | * | * | * | * | * | * | * | * | * | * | * | * | * | * | * | G | P | S | S | G | G |   |   |   |   |   |   |
| G11           | * | * | * | * | * | * | * | * | * | * | * | * | * | * | * | * | * | G | P | S | S | G | G |   |   |   |   |   |   |
| G12           | * | * | * | * | * | * | * | * | * | * | * | * | * | * | * | * | * | S | G | L | R | R | R | R | H | R | G | E |   |
| G13           | * | * | * | * | * | * | * | * | * | * | * | * | * | * | * | * | * | L | T | * | F | S | G | M | K | G |   |   |   |
| G14           | * | * | * | * | * | * | * | * | * | * | * | * | * | * | * | * | * | Q | * | S | R | D | G |   |   |   |   |   |   |
| G15           | * | * | * | * | * | * | * | * | * | * | * | * | * | * | * | * | * | H | W | R | G | Q | E | G |   |   |   |   |   |
| G16           | * | * | * | * | * | * | * | * | * | * | * | * | * | * | * | * | A | A | E | * |   |   |   |   |   |   |   |   |   |

**Fig. S3.** Sequence information of various mutant variants of tDeg.

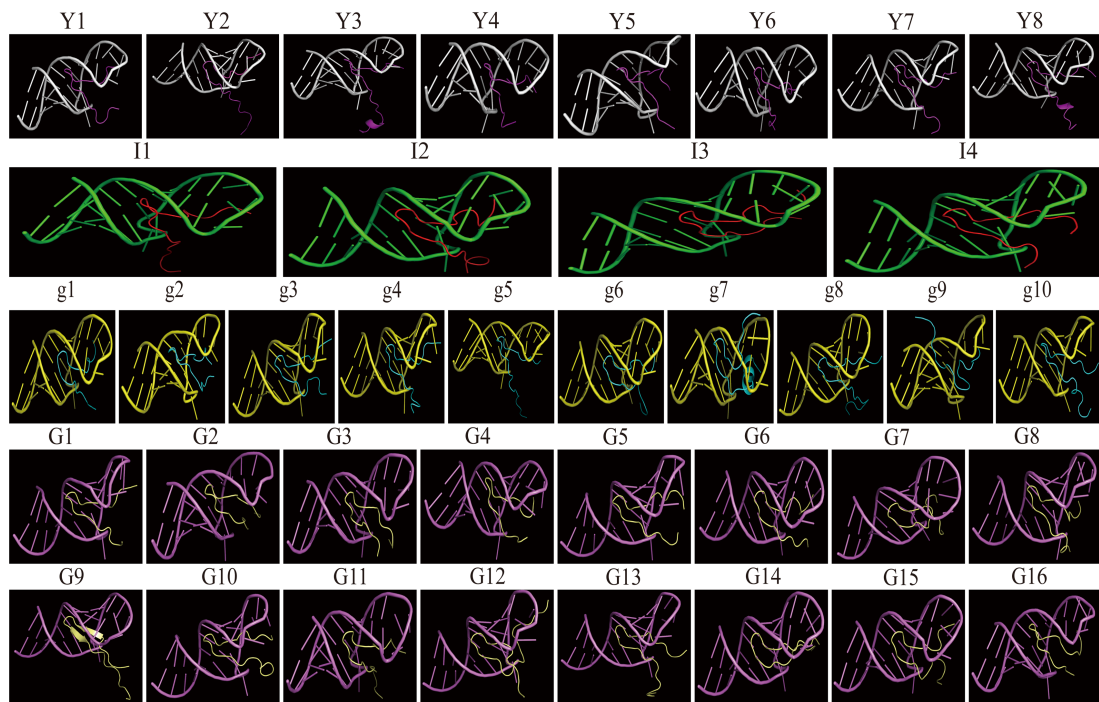

**Fig. S4.** Prediction the structure of mutant variants of tDeg in combination with pepper using AlphaFold3.

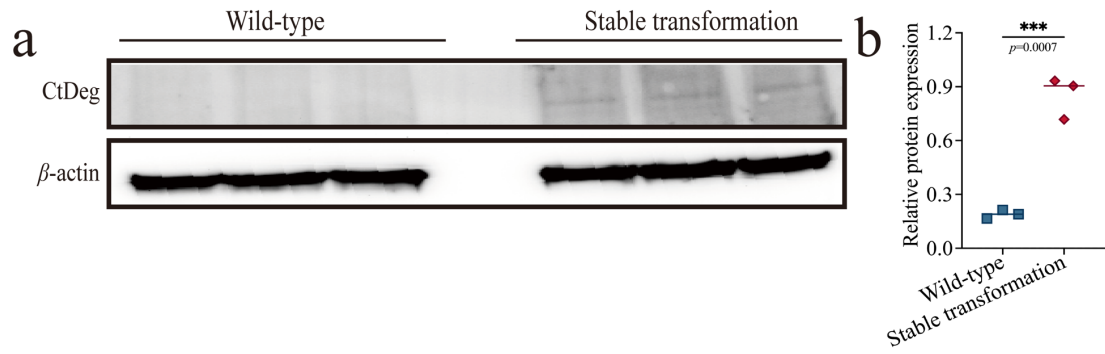

**Fig. S5. Construction of the CtDeg expressing stable cell lines.** (a) Western blotting analysis demonstrates the expression of the target protein (CMV-GFP<sub>(1-10)</sub>-MiniCMV-GFP<sub>11</sub>-sfGFP-dLwaCas13a-tDeg (G3)) in stable cell lines (Vero E6). (b) Statistics of target protein expression in wild type cells and stably transformed cells. Statistical analyses were performed using a t-test. \*\*\* indicates  $p$ -value < 0.001.

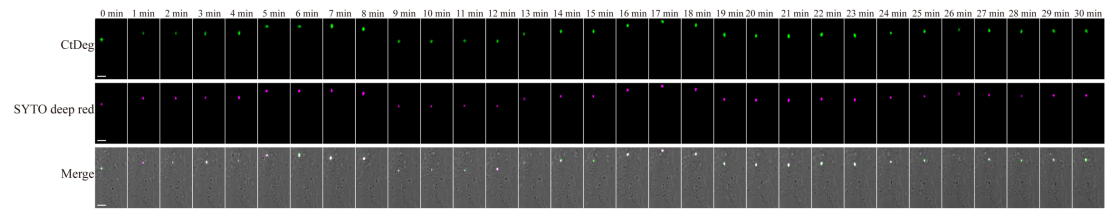

**Fig. S6.** Real-time microscopic images show the position of SARS-CoV-2 genomic RNA at different time points, captured at 1-minute intervals. Scale bars: 5  $\mu\text{m}$ .

**Video S1.** Fusion/kiss and run events of paraspeckles labeled by CtDeg were tracked over an 11-minute period at 1-minute intervals.

**Video S2.** The motion events of SARS-CoV-2 genomic RNA in the cytoplasm labeled by CtDeg and SYTO deep red was tracked over a 30-minute period at 1-minute intervals.

**Video S3.** The motion events of SARS-CoV-2 genomic RNA in the cytoplasm labeled by CtDeg and SYTO deep red was tracked over a 15-minute period at 3-minute intervals.
